# Supplementary material for: Synergic effects between boron and nitrogen atoms in BN-codoped C59−nBNnfullerenes (n= 1–3) for metal-free reduction of greenhouse N2O gas
Source: Royal Society of Chemistry journal article supplement (doi:10.1039/d1ra04046d), 2021-01-01

## “Supplementary Materials”

### **Synergic effects between boron and nitrogen atoms in BN-codoped C<sub>59-n</sub>BN<sub>n</sub> fullerenes (n=1-3) for metal-free reduction of greenhouse N<sub>2</sub>O gas**

**Mehdi D. Esrafil<sup>\*,a</sup>, Adnan Ali Khan<sup>b,c</sup>, Parisasadat Mousavian<sup>a,d</sup>**

<sup>a</sup> *Department of Chemistry, Faculty of Basic Sciences, University of Maragheh, P.O. Box 55136-553, Maragheh, Iran*

<sup>b</sup> *Centre for Computational Materials Science, University of Malakand, Chakdara, Pakistan*

<sup>c</sup> *Department of Chemistry, University of Malakand, Chakdara, Pakistan*

<sup>d</sup> *Department of Chemistry, Azarbaijan Shahid Madani University, Tabriz, Iran*

\* Corresponding author. **E-mail:** [esrafil@maragheh.ac.ir](mailto:esrafil@maragheh.ac.ir) (M. D. Esrafil).

**Figure S1.** The relaxed structures of single-vacancy defective fullerenes (from top and side views)

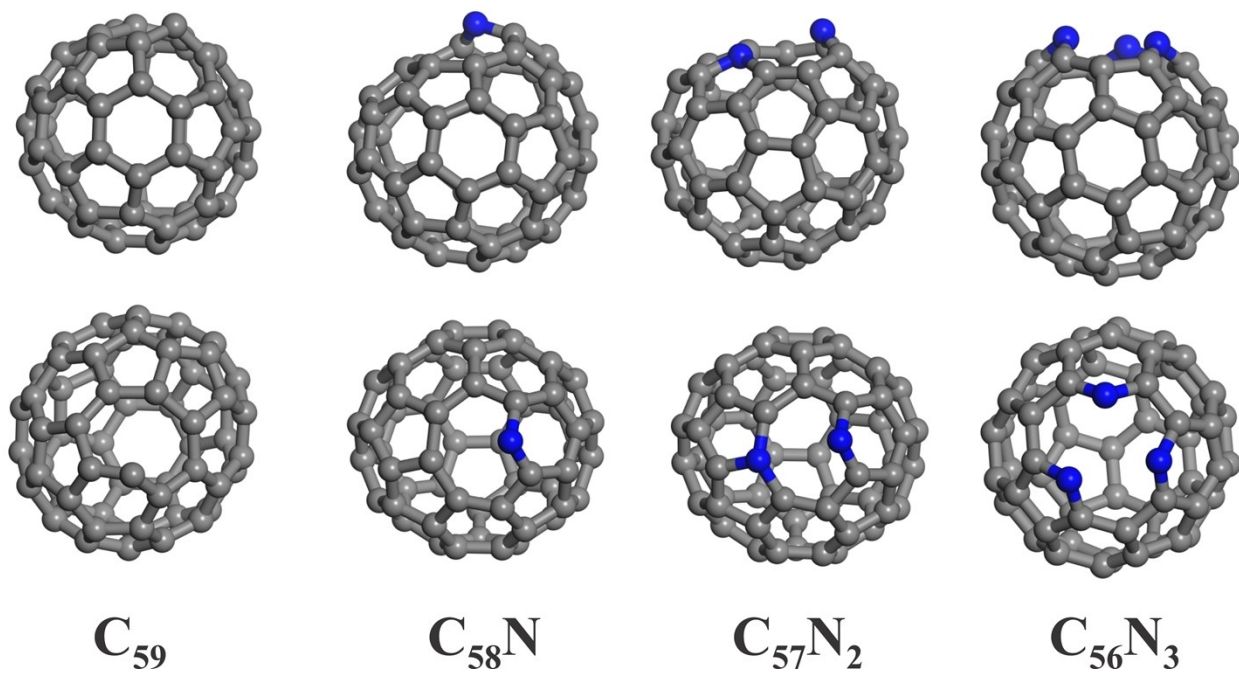

**Figure S2.** The geometries of BN-codoped fullerenes after the MD simulations (2000 fs, at 600 K) and the corresponding energy profile

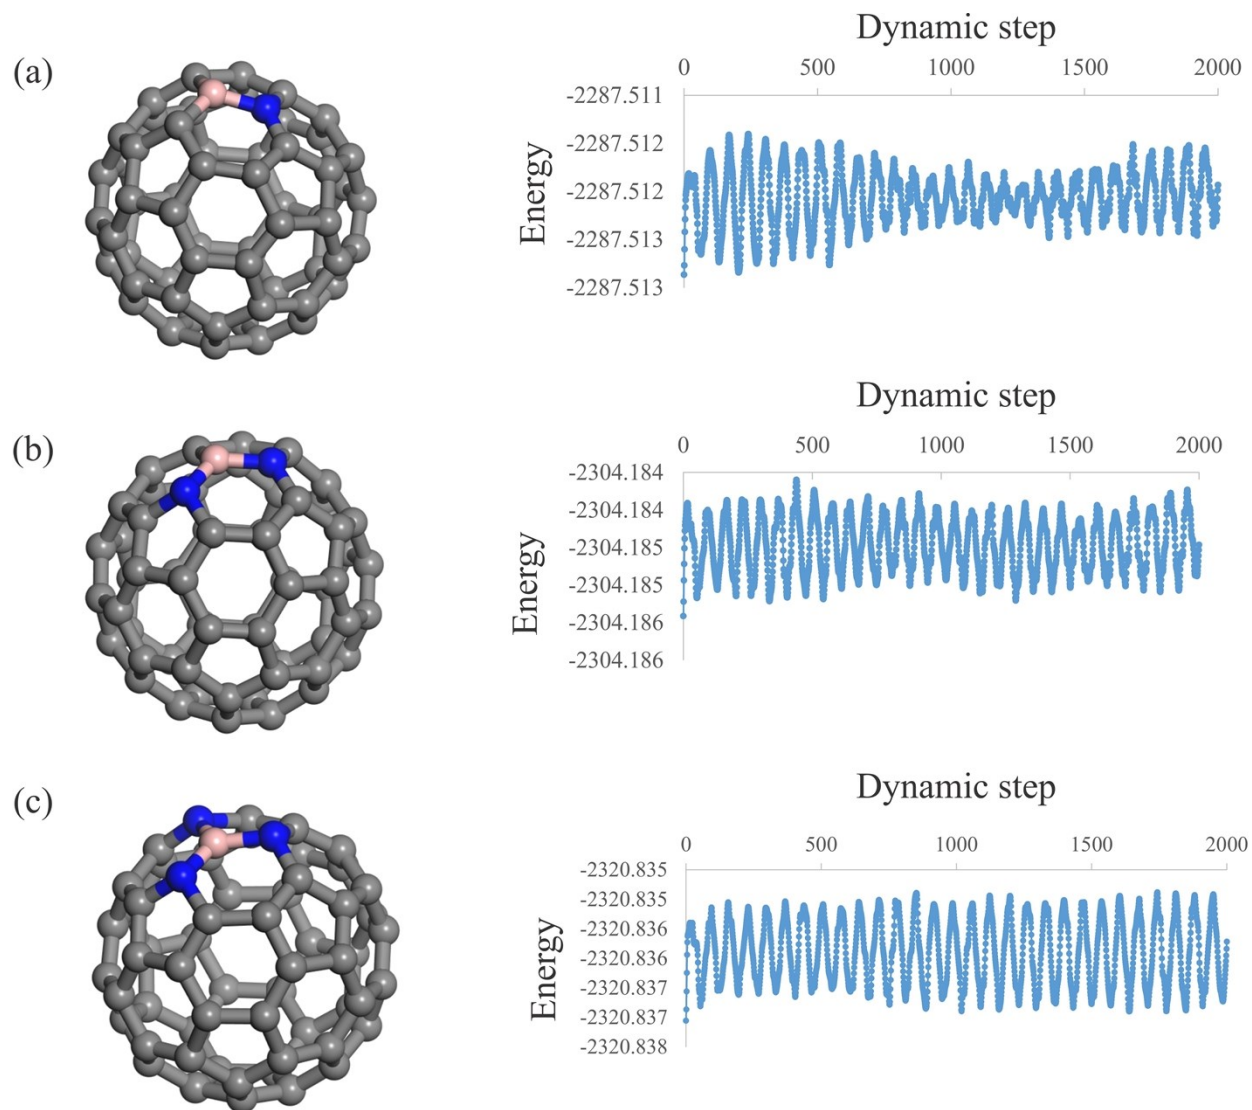

**Figure S3.** The relaxed structures of N<sub>2</sub>O (left) and CO adsorbed (right) configurations onto Kr endohedral fullerenes (a) C<sub>59</sub>B, (b) C<sub>58</sub>BN, (c) C<sub>57</sub>BN<sub>2</sub> and (d) C<sub>56</sub>BN<sub>3</sub>

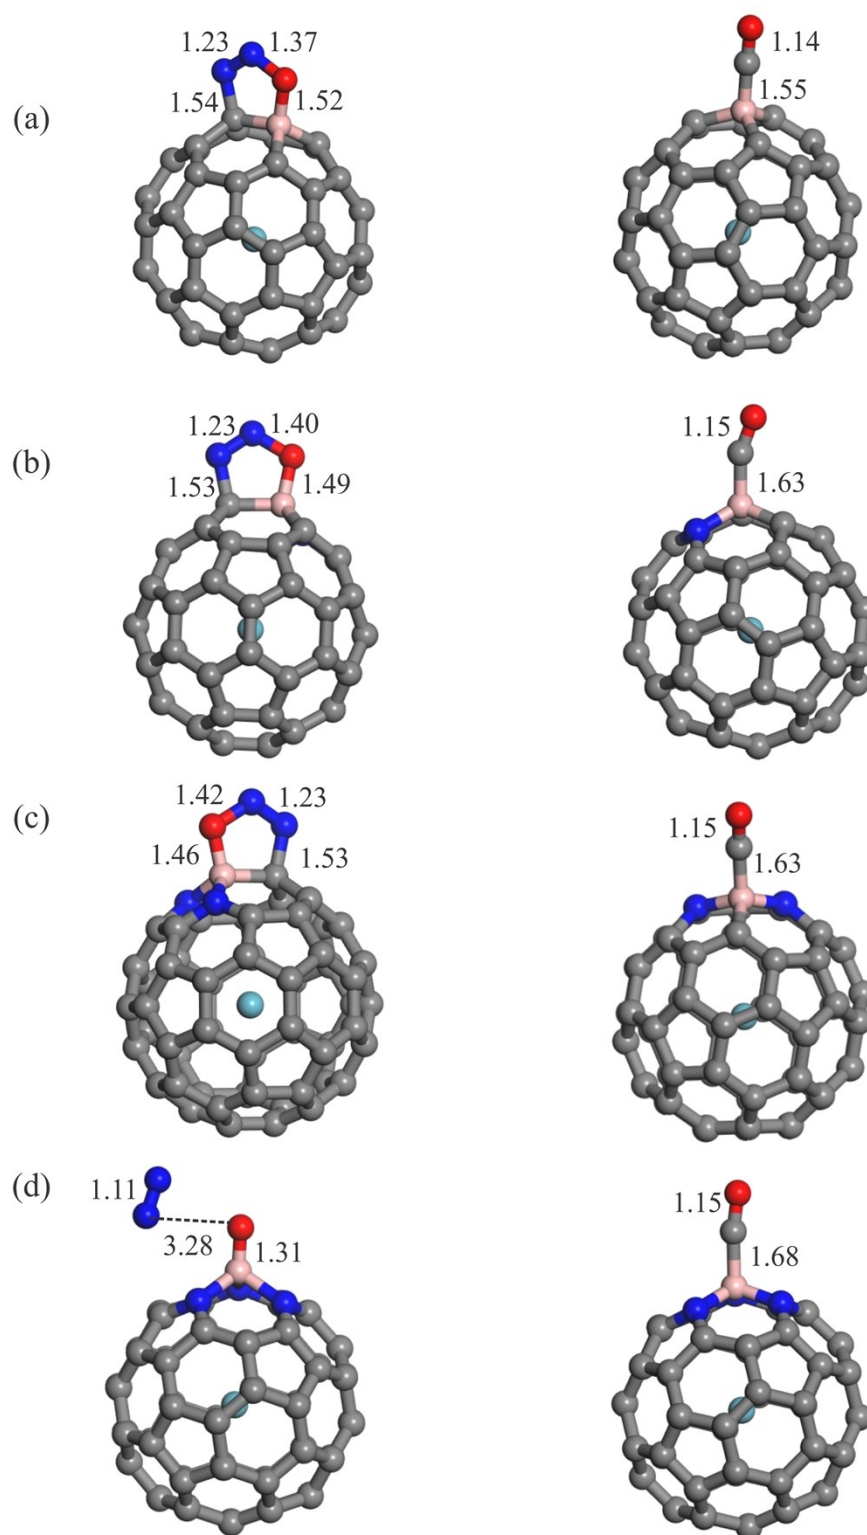

Supplement: d1ra04046d1.pdf [file d1ra04046d1.pdf]
